# Supplementary material
Source: PubMed Central journal article supplement (PMC7020240)

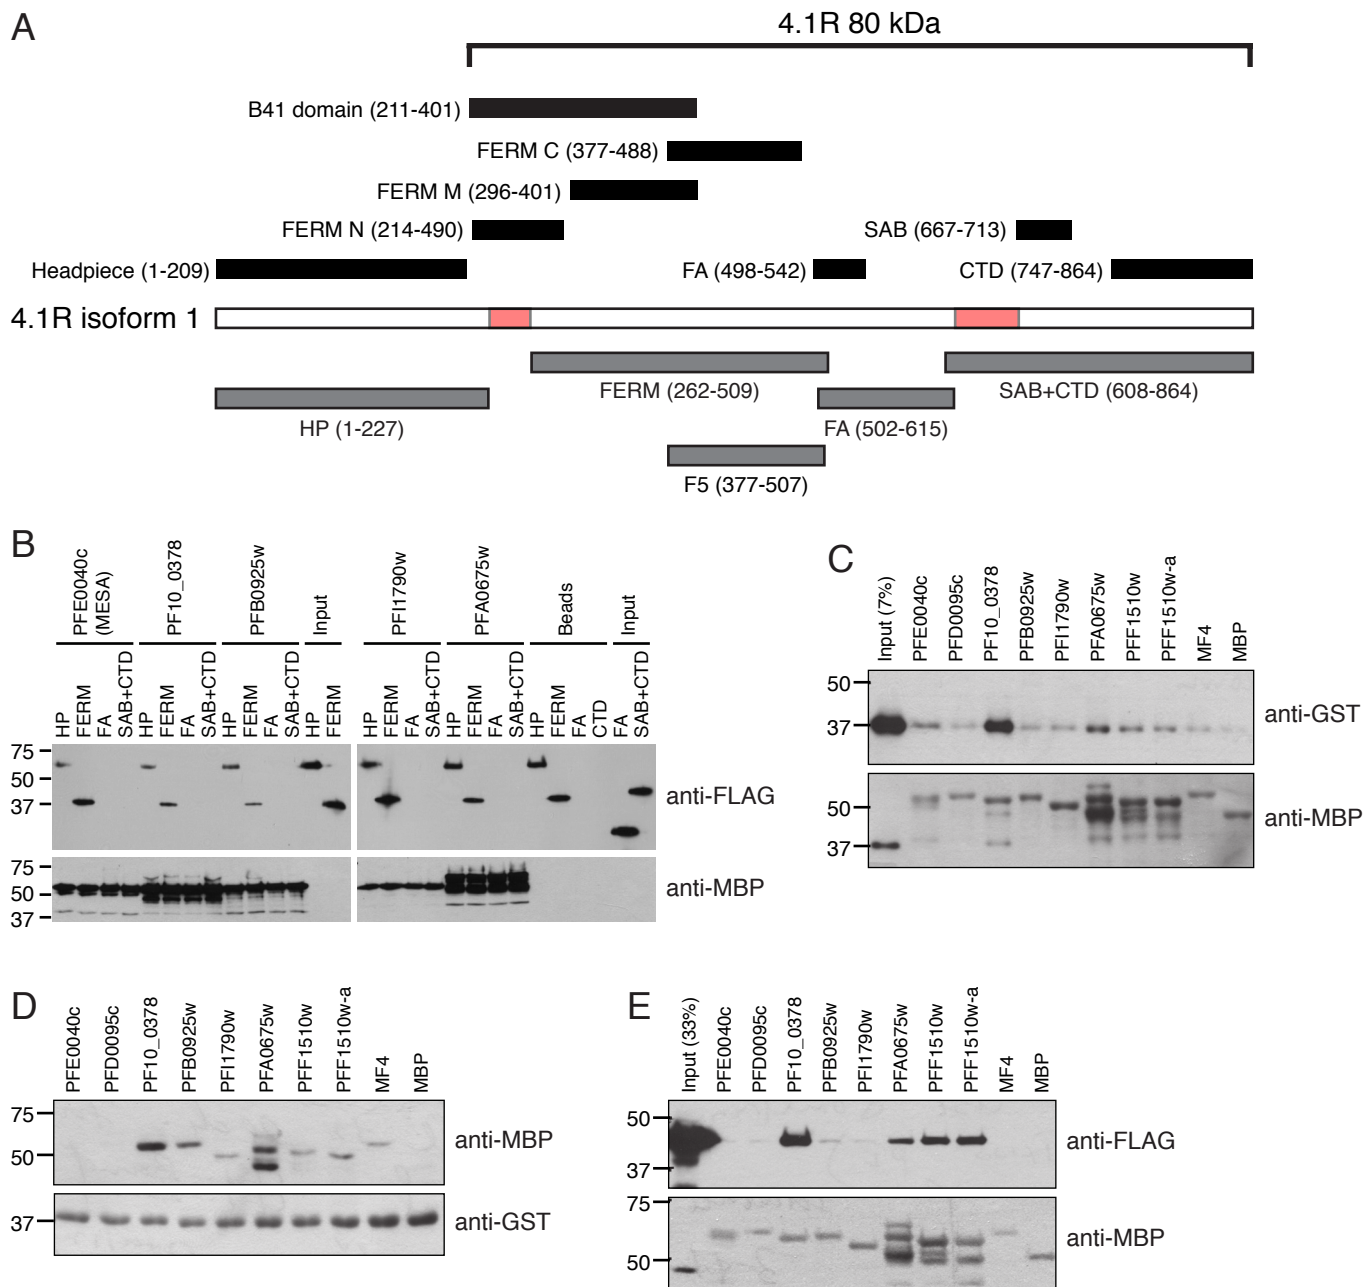

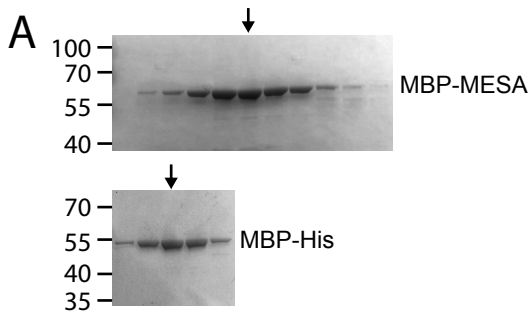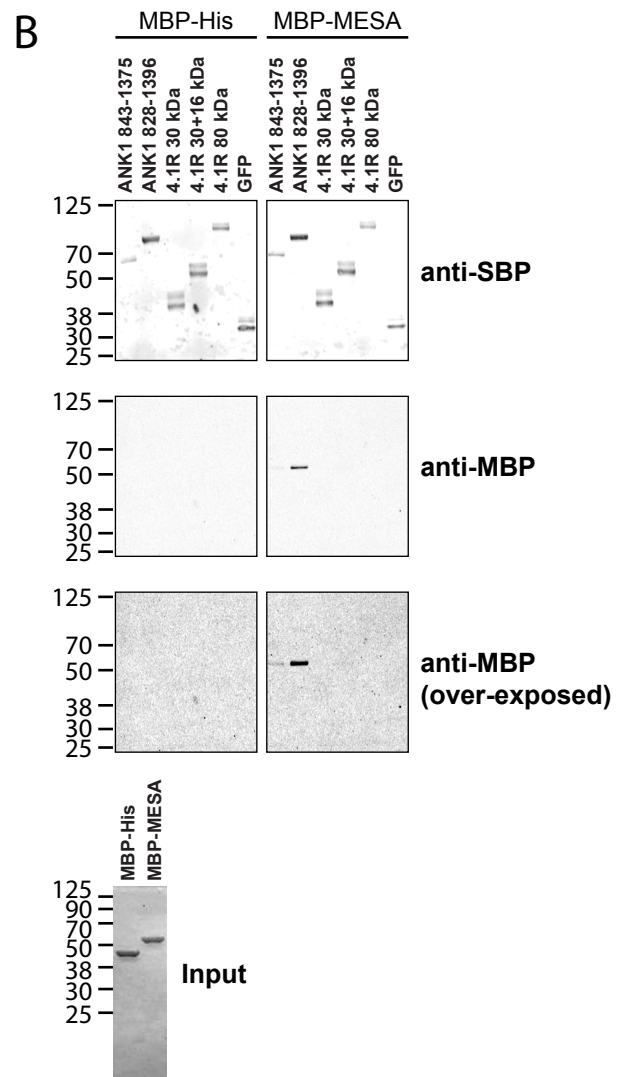

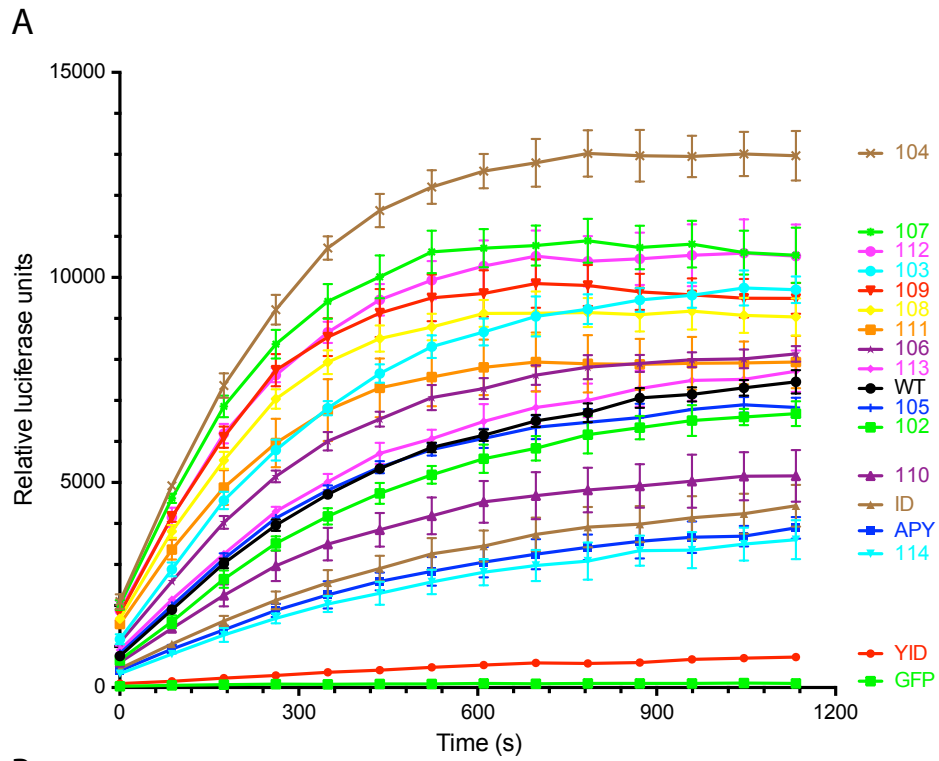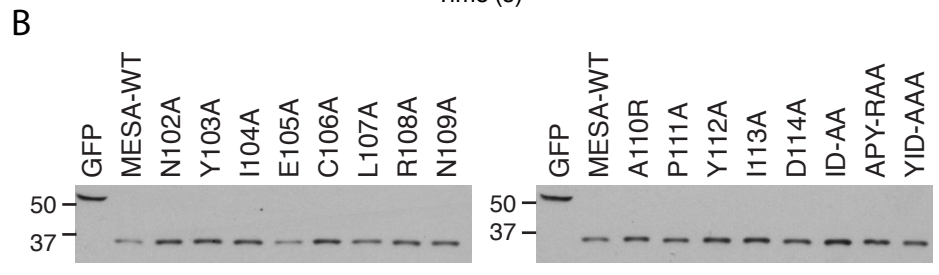

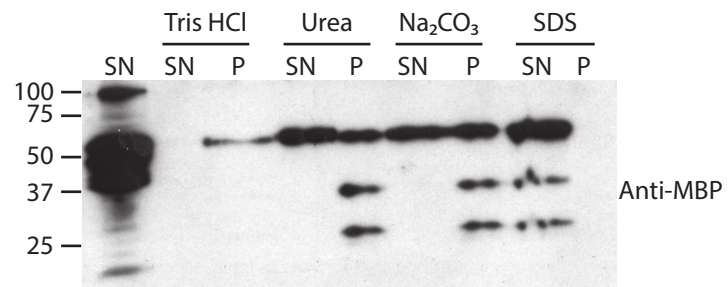

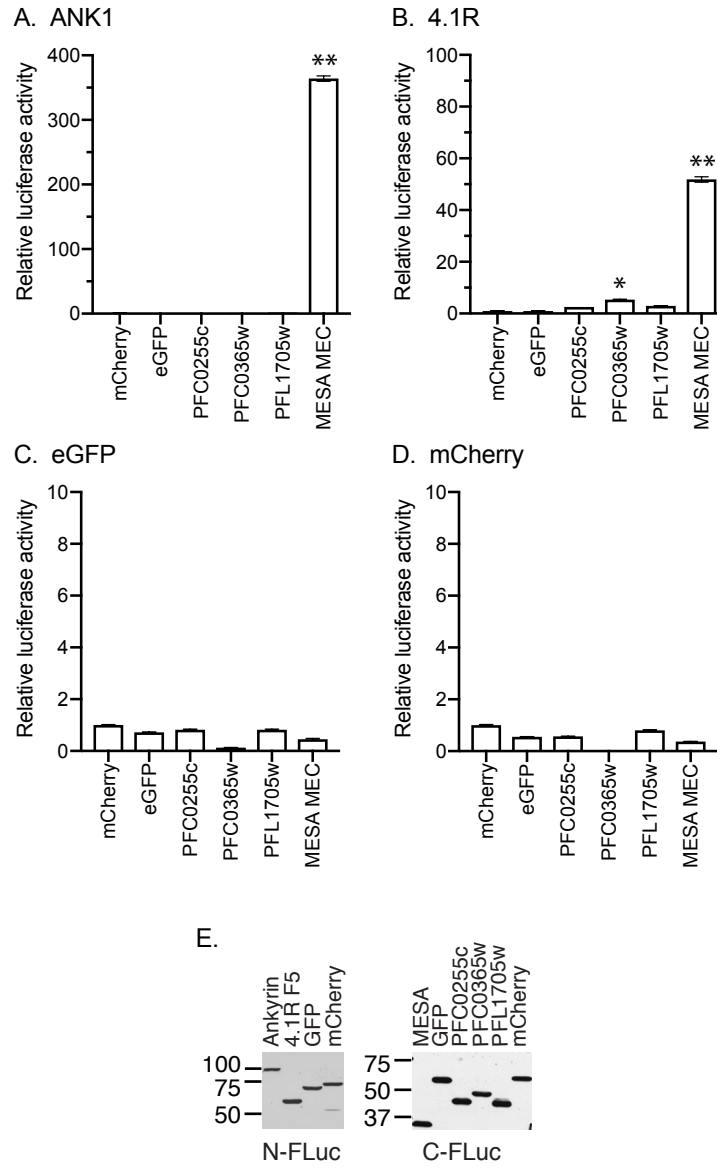

Supplement: NIHMS1530066-supplement-1.pdf [file NIHMS1530066-supplement-1.pdf]
